# Supplementary material
Source: PubMed Central journal article supplement (PMC4922152)
Supplement: pnas.1521066113.sapp.pdf [file pnas.1521066113.sapp.pdf]

# Ancient mitochondrial DNA sequences from the First Australians revisited

Tim H. Heupink<sup>a</sup>, S. Subramanian<sup>a</sup>, Joanne L. Wright<sup>a</sup>, Phillip Endicott<sup>b,1</sup>, Michael C. Westaway<sup>a</sup>, Leon Huynen<sup>a</sup>, Walther Parson<sup>cd</sup> Craig D. Millar<sup>e</sup>, Eske Willerslev<sup>f2</sup>, David M. Lambert<sup>a2</sup>

<sup>a</sup> Environmental Futures Research Institute, Griffith University, 170 Kessels Road, Nathan, QLD 4111 Australia, <sup>b</sup> Department of Zoology, South Parks Road, Oxford University, Oxford, <sup>c</sup> Institute of Legal Medicine, Innsbruck Medical University, Austria, <sup>d</sup> Forensic Science Program, The Pennsylvania State University, University Park, Pennsylvania, USA, <sup>e</sup> Allan Wilson Centre for Molecular Ecology and Evolution, School of Biological Sciences, University of Auckland, Private Bag 92019, Auckland 1142, New Zealand, <sup>f</sup> Centre for GeoGenetics, University of Copenhagen, Denmark.

## SI APPENDIX

### Supplementary methods

#### *Sequencing, base-calling and adapter trimming*

All libraries, both non-capture and capture, were screened on a Bioanalyzer 2100 (Agilent) to ensure that the DNA length distributions did not show any significant artefacts from amplification (e.g. artificially long molecules due to serial binding). The library build blanks as well as the library builds for the extraction blanks were screened on the Bioanalyzer. The resulting libraries were 100bp single end sequenced on the HiSeq 2000 Sequencing System (Illumina). Sequences were base-called using CASAVA 1.8.2 (Illumina) and adapters were trimmed from the sequencing data using AdapterRemoval-1.5.4 (1) with the following options: a minimum 30bp length requirement after trimming and trimming terminal N's and low quality bases from the sequences using default parameters.

#### *Determining levels of human DNA*

First we determined the levels of human DNA by mapping the resulting reads to the complete human reference genome (GRCh37.p13, excluding alternative and patch scaffolds). Mapping was done using BWA 0.6.2-r126 (2) with the following options: seed disabled (3) and terminal low quality trimming (-q15). Unmapped and duplicate reads were removed from the resulting BAM file using Picard 1.68 (<http://broadinstitute.github.io/picard/>). The GenomeAnalysisToolKit-3.2-2 (GATK, 4) RealignerTargetCreator and IndelRealigner tools were used to improve alignment around insertions and deletions.

#### *Determining authentic ancient DNA*

Damage was estimated for each of the combined sample libraries using the program MapDamage (5), we averaged the proportions of 5' C>T and 3' G>A mutations on the terminal base to report damage. The GATK ReadLengthDistribution tool was used to count the number of occurrences of each read length.

#### *Mitochondrial analysis*

All reads were also mapped to only the revised Cambridge reference mitochondrial genome (6) and damage parameters were estimated where possible. The GATK UnifiedGenotyper with ploidy set to 1 was used to call a consensus vcf. The FastaAlternateReferenceMaker tool was then used to convert this to a fasta file based on positions with a Phred quality score of 30 or higher. The resulting sequence's regions that are prone to base call errors, i.e. the mononucleotide repeats around position 310, the ambiguous base at position 3107 and genuine deletions, were manually checked for errors. Coverage statistics were inferred using the DepthOfCoverage function in GATK. Haplogroups were inferred manually using mtDNA tree build 16 (7). Where multiple variants were observed the haplotypes and their level of presence were inferred by realigning the mapped reads to the RSRS (6, Table S4). The reads from WLH4 were sorted according to haplotype of origin and both datasets were subjected to the same methods of damage and read length inference, as described earlier.

#### *Bioinformatics*

Previously published complete Aboriginal Australian mitochondrial genomes and the sequence identified here for WLH4 were aligned using MAFFT v7.164b (8) using the default settings. The maximum likelihood tree was inferred using MEGA5.2 (9) with a GTR model and six gamma categories, ape and archaic human sequences were used to root the tree, but are not shown (Fig. 3, accession numbers are reported in Table S6). The mitochondrial sequence reported by Rasmussen et al. (10) was filtered for

calls with Phred quality scores of 30 or higher for this purpose. Haplogroups were inferred using HaploFind (11). The sequences from Adcock et al. (12) and those obtained in this study (trimmed to the same locus) were aligned using MAFFT (Table S7).

To estimate the age of the common most recent ancestor of WLH4 and modern Aboriginal Australians (MRCA) we collected all available complete mitochondrial genomes belonging to the haplogroup S2. We also included the mitogenomes of other representative Australian haplogroups along with African (L0 and L1 haplogroups) and Neanderthal outgroups. We constructed a Bayesian tree, using BEAST (13) using a HKY+G+I model and a relaxed log-normal molecular clock model. To calibrate the molecular clock we used the tip dates of Neanderthal (39,000 years) and WLH4 (1,600 years). We also used the age of human-Neanderthal split (320,000 – 620,000 years) to calibrate the root of the tree. A uniform prior distribution of 0 – 1E100 substitutions per site per year was used for the clock rate. A normal prior distribution with a mean of 470,000 years and a standard deviation was used in such a way that 95% of the prior calibration times fall between 320,000 – 620,000 years. These priors were based on the human-Neanderthal divergence estimated by a previous study using six Neanderthal mitochondrial genomes (14). The default priors were used for all other parameters. Based on the stratigraphic location of the burial of the skeletal remains, occlusal and task activity wear on the teeth, and lack of any mineralisation in the bone, the age of WLH4 can be estimated to be between 500 and 3,000 years old. Hence we used the mean value of 1,600 years for the calibration. However the age of the S2 haplogroup did not vary much when 500 and 3,000 years were used for the age of WLH4 (34.5 and 36.4 Kyr respectively).

#### *PCR-based approach*

We also obtained a quantity of the homogenised bone powder from WLH3 used in the original extractions (supplied by Gregory Adcock). The WLH3 bone was digested and purified using the silica binding method following the protocols of Brotherton et al. (15). A portion of the resulting extract (40uL) was made into a primary library, which was used in a targeted enrichment for human mtDNA. The resulting secondary library was quantified using quantitative realtime PCR before sequencing on an Ion Torrent personal genome machine.

After removal of the adaptors the sequences were aligned to the rCRS using the Geneious suite of software. A BAM file was exported and processed using PMD Tools. After filtering for damage, we did not observe any

sequences likely to originate from either endogenous or contaminating human mtDNA. This is consistent with attempts to amplify 50bp and 70bp human mtDNA fragments from the original extract using qPCR, which also returned no products.

We also investigated the original DNA extracts for WLH3 and KS8 used by Adcock et al. (12). After separation on a 3% agarose gel for 1 hour at 50 volts the products were excised under a low intensity UV light and purified using a Minelute column (Qiagen) according to the manufacturers instructions. The products were then cloned using the TopoTA system (Invitrogen) and multiple colonies amplified using T7 and M13R primers, and sequenced using an ABI capillary sequencer.

The SPEX assays followed the procedure detailed in (16), using the primer set targeting np 16224. Cloning was conducted using the TopoTA system (Invitrogen).

#### *Phylogenetic re-examination of the HVR1 sequences*

We re-examined the phylogenetic relationship and molecular divergences between ancient Australian mtDNA reported by Adcock et al. and those from contemporary Australians. For this purpose we obtained HVR1 region from 137 Australian Aborigines (Table S6). We also included HVR1 from LM3 (WLH3) and LM4 (WLH 4) reported by Adcock et al. and the ancient sequence obtained from WLH4 in this study. We used HVR1 sequences from Neanderthal, bonobo and chimpanzee as outgroups. This dataset is similar to that reported in Figure 1 of Adcock et al.. but with additional modern Aboriginal sequences. The HVR1 sequences were aligned using MUSCLE (17) with default settings. To obtain the best model of sequence evolution we used Modeltest implemented in the software MEGA5.2 (9). This analysis suggested the Tamura-Nei + Gamma model as the best, which was then used to construct the maximum likelihood tree using MEGA5.2, for visual clarity we excluded the Chimpanzee and Bonobo sequences (Figure S4).

We also estimated pairwise distances between ancient and modern First peoples (Figure S5). First we determined the extent of among-site variations based on a maximum likelihood method and obtained the gamma parameter. We then estimated the Tamura-Nei distance using the gamma value. Finally the pairwise Tamura-Nei distances were multiplied by the length of the HVR1 to obtain the number of differences. Since this method accounts for multiple hits as well as base compositional bias the pairwise differences obtained are more accurate.

In order to investigate the ability of the locus used by Adcock et al. (12) to correctly infer phylogenetic relationships we aligned the complete mitochondrial genomes reported by Ingman et al. (18) and additional ape and archaic human sequences (accession numbers in Table S6) using MAFFT (8). The maximum likelihood tree was inferred using RaxML (19, with GTRCAT model and gorilla forced as outgroup, Fig. S5A). The same approach was used for the same dataset trimmed to amplicon reported by Adcock et al. (positions 16047-16399 on the rCRS, Fig. S5B).

### **Willandra Lakes Community and Elder approval**

This research has been conducted in partnership with the Willandra Council of Elders. Before applying to Australian Research Council funding to support the research, we consulted extensively with the Elders regarding the nature and extent of the proposed study. We emphasised that, because the skeletal remains is, in most cases, very old, we could not be confident of being able to recover any DNA sequences from them. We have met with them on two occasions to discuss the work. At their meeting on Monday 1<sup>st</sup> March 2010, the Elders of the Barkindji and Ngayampaa People unanimously resolved to support this application and to agree to DNA sampling of the Willandra collection of sub-fossil human remains. These were, at the time, held at the Australian National University. Later in 2013 the Muthi Muthi People returned to the management structure of the Willandra Lakes World Heritage Area. We met with the Muthi Muthi Elders and provided them with an overview of the research results. This was also discussed in a plain language report providing an overview of the results. At this time we also met with the Barkindji and Ngayampaa to provide an overview of the results. Finally a draft of this paper was sent to all Traditional Owners for comment.

# Willandra Lakes Region World Heritage Area

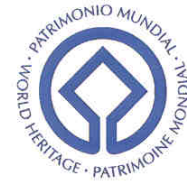

5<sup>th</sup> May, 2010

Dr Michael Westaway  
Department of Archaeology  
GPO Box 2100  
Adelaide SA 5001

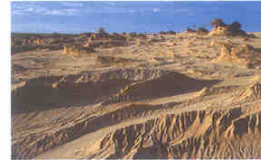

Dear Michael

At the Two Traditional Tribal Groups of the Willandra Lakes Elders Council meeting held on Monday 1<sup>st</sup> March, 2010 approval was granted by the Elders for your request for a research proposal, to examine skeletal DNA from Willandra Lakes Region Skeletal remains. We would also like to accept your offer to be involved during the process of this proposal when taking samples from remains that are currently housed at the Australian National University.

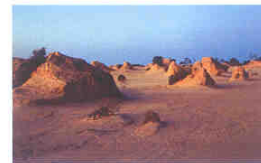

A minimum of two Tribal Elders will need to be present. It is expected that you will cover their travel and accommodation costs. This office can assist in organising Elders attendance and in approving access to the collections in Canberra.

Note that the two Traditional Tribal Groups are the Paakantji and the Ngyiampaa and that acknowledgement should be given to these groups in any published material.

I look forward to hearing from you.

Regards,

Richard Mintern  
Willandra Lakes World Heritage Area  
Executive Officer  
Ph: 03 5021 8908

Phone: (03) 5021 8908  
Fax: (03) 5022 2037

**Table S1 - Genomic mapping results for each library**

| <b>Library</b> | <b>Number of reads</b> | <b>After trimming</b> | <b>Number of mapped reads</b> | <b>%</b> | <b>Unique reads</b> | <b>%</b> | <b>Duplication (%)</b> |
|----------------|------------------------|-----------------------|-------------------------------|----------|---------------------|----------|------------------------|
| WLH3.a Lib1    | 25,101,862             | 22,550,698            | 215,389                       | 0.96     | 154,199             | 0.68     | 28.4                   |
| WLH3.a Lib2    | 25,156,974             | 22,414,695            | 620,112                       | 2.77     | 173,996             | 0.78     | 71.9                   |
| WLH3.a Lib3    | 119,339,411            | 106,286,647           | 7,729,959                     | 7.27     | 5,627,144           | 5.29     | 27.2                   |
| WLH3.a Lib4    | 29,651,240             | 28,054,447            | 14,666,540                    | 52.28    | 6,690,697           | 23.85    | 54.4                   |
| WLH3.b Lib1    | 6,308,912              | 4,959,856             | 43,575                        | 0.88     | 42,938              | 0.87     | 1.5                    |
| WLH3.b Lib2    | 18,642,556             | 16,026,385            | 129,316                       | 0.81     | 120,450             | 0.75     | 6.9                    |
| WLH3.b Lib3    | 163,285,552            | 139,106,711           | 597,545                       | 0.43     | 557,290             | 0.40     | 6.7                    |
| WLH3.b Lib4    | 15,195,584             | 13,990,868            | 2,827,564                     | 20.21    | 1,530,158           | 10.94    | 45.9                   |
| WLH4 Lib1      | 1,106,086,943          | 1,072,269,973         | 27,892,736                    | 2.60     | 5,039,684           | 0.47     | 81.9                   |
| WLH4 Lib2      | 1,248,113,984          | 1,127,661,246         | 34,514,023                    | 3.06     | 23,366,949          | 2.07     | 32.3                   |
| WLH4 Lib3      | 1,072,627,373          | 1,029,105,777         | 34,376,116                    | 3.34     | 15,494,830          | 1.51     | 54.9                   |
| WLH15.a Lib1   | 33,425,874             | 30,734,878            | 3,547                         | 0.01     | 3,491               | 0.01     | 1.6                    |
| WLH15.b Lib1   | 17,315,925             | 16,140,276            | 25,344                        | 0.16     | 22,725              | 0.14     | 10.3                   |
| WLH55 Lib1     | 11,890,710             | 11,386,223            | 1,181                         | 0.01     | 1,151               | 0.01     | 2.5                    |
| WLH55 Lib2     | 15,306,560             | 14,440,116            | 2,311                         | 0.02     | 2,281               | 0.02     | 1.3                    |
| WLH3IT Lib1    | 182,128                | 49,144                | 207                           | 0.42     | 144                 | 0.29     | 30.4                   |

**Table S2 - Genomic and mitochondrial capture statistics**

| Reference     | Before capture |                  |                  | After capture |                  |                  | Enrichment       |                  |
|---------------|----------------|------------------|------------------|---------------|------------------|------------------|------------------|------------------|
|               | Library        | Mapped Reads (%) | Unique Reads (%) | Library       | Mapped Reads (%) | Unique Reads (%) | Mapped Reads (X) | Unique Reads (X) |
| Genomic       | WLH3.a Lib3    | 7.27             | 5.29             | WLH3.a Lib4   | 52.82            | 23.85            | 7.2              | 4.5              |
| Genomic       | WLH3.b Lib3    | 0.43             | 0.40             | WLH3.b Lib4   | 20.21            | 10.94            | 47.0             | 27.4             |
| Mitochondrial | WLH3.a Lib3    | 0.0053           | 0.0035           | WLH3.a Lib4   | 0.679            | 0.0339           | 127.6            | 9.7              |
| Mitochondrial | WLH3.b Lib3    | 0.0003           | 0.0003           | WLH3.b Lib4   | 0.283            | 0.0326           | 874.4            | 109.7            |

**Table S3 - Read lengths and molecular damage observed for nuclear and mitochondrial sequences**

| Sample | Human genome (GRCh37)  |                     |                   | Mitochondrial genome (rCRS) |                     |                   |
|--------|------------------------|---------------------|-------------------|-----------------------------|---------------------|-------------------|
|        | Number of Unique reads | Average read Length | Terminal Base C>T | Number of Unique reads      | Average read Length | Terminal Base C>T |
| WLH3.a | 10,479,485             | 79.1                | 0.01              | 9,749                       | 79.3                | 0.01              |
| WLH3.b | 2,130,967              | 78.5                | 0.01              | 4,701                       | 77.6                | 0.01              |
| WLH4   | 43,293,836             | 67.8                | 0.07              | 27,623                      | 75.4                | 0.13              |
| WLH15  | 26,216                 | 55.7                | 0.01              | 6                           | 69.7                | NA                |
| WLH55  | 3,432                  | 60.5                | 0.00              | 1                           | 94.0                | NA                |
| WLH3IT | 122                    | 51.4                | NA                | 29                          | 49.4                | NA                |

**Table S4 - Highly variable nucleotide sites in the mapped mitochondrial sequences**

WLH3.a

| Position | Reference base | Alternate base | Reference count | Alternate count | Alternate percent | Associated haplotype |
|----------|----------------|----------------|-----------------|-----------------|-------------------|----------------------|
| 56       | A              | AG             | 8               | 36              | 82%               | H ancestral          |
| 73       | G              | A              | 7               | 50              | 88%               |                      |
| 309      | C              | T              | 27              | 4               | 13%               |                      |



|       |           |           |    |    |     |             |
|-------|-----------|-----------|----|----|-----|-------------|
| 2706  | G         | A         | 8  | 33 | 80% | H ancestral |
| 3010  | G         | A         | 45 | 4  | 8%  | H1          |
| 3093  | C         | A,T       | 35 | 3  | 8%  |             |
| 3110  | C         | A,T       | 30 | 3  | 9%  |             |
| 3197  | T         | C         | 37 | 7  | 16% | U5a'b       |
| 6221  | T         | C         | 41 | 5  | 11% |             |
| 6253  | T         | C         | 13 | 32 | 71% | H15a1       |
| 6691  | GAAAAAAAA | GAAAAAAAA | 36 | 3  | 8%  |             |
| 7028  | T         | C         | 5  | 40 | 89% | H ancestral |
| 7379  | G         | A         | 32 | 5  | 14% |             |
| 7400  | C         | T,A       | 33 | 3  | 8%  |             |
| 9477  | G         | A         | 51 | 9  | 15% | U5a'b       |
| 11410 | T         | C         | 16 | 25 | 61% | H15a1       |
| 11467 | A         | G         | 38 | 9  | 19% | U5a'b       |
| 11719 | A         | G         | 5  | 43 | 90% | H ancestral |
| 12308 | A         | G         | 47 | 6  | 11% | U5a'b       |
| 12372 | G         | A,T       | 40 | 8  | 17% | U5a'b       |
| 13617 | T         | C         | 42 | 7  | 14% | U5a'b       |
| 13759 | G         | A,T       | 44 | 4  | 8%  |             |
| 14766 | T         | C         | 6  | 45 | 88% | H ancestral |
| 14793 | A         | G         | 50 | 8  | 14% | U5a'b       |
| 14953 | C         | T         | 9  | 27 | 75% | H15a1       |
| 15301 | G         | A         | 34 | 3  | 8%  |             |

#### WLH3.b

| Position | Reference base | Alternate base | Reference count | Alternate count | Alternate percent | Associated haplotype |
|----------|----------------|----------------|-----------------|-----------------|-------------------|----------------------|
| 195      | C              | T              | 2               | 13              | 87%               |                      |
| 309      | C              | T              | 17              | 3               | 15%               |                      |
| 310      | T              | C              | 13              | 5               | 28%               |                      |
| 3010     | G              | A              | 22              | 5               | 19%               | H1                   |
| 4218     | T              | C              | 11              | 10              | 48%               |                      |
| 6776     | T              | C              | 20              | 5               | 20%               | H3                   |
| 7444     | G              | A              | 4               | 11              | 73%               | H40b                 |
| 7621     | T              | C              | 10              | 8               | 44%               | H40b                 |
| 7678     | T              | C              | 11              | 13              | 54%               | H40b                 |
| 8063     | T              | C              | 22              | 6               | 21%               |                      |
| 15378    | T              | G,A            | 13              | 2               | 13%               |                      |

#### WLH4

| Position | Reference base | Alternate base | Reference count | Alternate count | Alternate percent | Associated haplotype |
|----------|----------------|----------------|-----------------|-----------------|-------------------|----------------------|
| 72       | T              | C              | 87              | 32              | 27%               | V3c                  |
| 73       | G              | A              | 86              | 35              | 29%               | V3c                  |
| 152      | C              | T              | 89              | 16              | 15%               |                      |

|       |   |     |     |     |     |     |
|-------|---|-----|-----|-----|-----|-----|
| 2380  | C | T   | 18  | 96  | 84% | S2  |
| 3438  | G | A   | 21  | 93  | 82% | S2  |
| 4580  | G | A   | 103 | 29  | 22% | V3c |
| 5261  | G | A   | 23  | 119 | 84% |     |
| 6167  | T | C   | 24  | 99  | 80% | S2  |
| 7283  | T | C   | 27  | 84  | 76% |     |
| 8281  | C | A   | 22  | 79  | 78% |     |
| 8404  | T | C   | 20  | 93  | 82% | S2  |
| 8537  | A | G   | 32  | 88  | 73% |     |
| 9077  | T | C   | 103 | 19  | 16% |     |
| 11719 | A | G,T | 104 | 28  | 21% | V3c |
| 12705 | T | C   | 90  | 16  | 15% | V3c |
| 12810 | A | G   | 110 | 23  | 17% | V3c |
| 14766 | T | C   | 89  | 13  | 13% | V3c |
| 15236 | A | G   | 24  | 103 | 81% |     |
| 15904 | C | T   | 91  | 16  | 15% | V3c |
| 16072 | C | T   | 21  | 93  | 82% |     |
| 16179 | C | T   | 13  | 80  | 86% |     |
| 16184 | C | T   | 13  | 81  | 86% |     |
| 16216 | A | G   | 98  | 13  | 12% | V3c |
| 16298 | T | C   | 89  | 16  | 15% | V3c |

**Table S5 - Details for library construction.**

| <b>Remains</b>   | <b>PCR protocol</b> | <b>Primary Cycles</b> | <b>Secondary Cycles</b> | <b>Capture</b>         | <b>Post-Capture Cycle</b> |
|------------------|---------------------|-----------------------|-------------------------|------------------------|---------------------------|
| WLH3a library 1  | AccuPrime           | 12                    | 8                       | -                      | -                         |
| WLH3a library 2  | AccuPrime           | 12                    | 8                       | -                      | -                         |
| WLH3a library 3  | Kapa HiFi Uracil+   | 10                    | 8                       | Before capture library | -                         |
| WLH3a library 4  | Kapa HiFi Uracil+   | 10                    | 8                       | After capture library  | 16                        |
| WLH3b library 1  | AccuPrime           | 12                    | 0                       | -                      | -                         |
| WLH3b library 2  | AccuPrime           | 12                    | 0                       | -                      | -                         |
| WLH3b library 3  | Kapa HiFi Uracil+   | 10                    | 4                       | Before capture library | -                         |
| WLH3b library 4  | Kapa HiFi Uracil+   | 10                    | 4                       | After capture library  | 18                        |
| WLH4 library 1   | AccuPrime           | 12                    | 8                       | -                      | -                         |
| WLH4 library 2   | AccuPrime           | 12                    | 0                       | -                      | -                         |
| WLH4 library 3   | Platinum Taq HiFi   | 12                    | 12                      | -                      | -                         |
| WLH15a library 1 | AccuPrime           | 12                    | 0                       | -                      | -                         |
| WLH15b library 1 | AccuPrime           | 12                    | 0                       | -                      | -                         |
| WLH55 library 1  | AccuPrime           | 12                    | 0                       | -                      | -                         |
| WLH55 library 2  | AccuPrime           | 12                    | 0                       | -                      | -                         |
| WLH3IT library 1 | IonTorrent          | -                     | -                       | -                      | -                         |

**Table S6 – Sequence Details**

**Table S6A - Details of the sequences shown in Figure 2**

| Number    | Origin        | Haplogroup | Accession Number | Note                    |
|-----------|---------------|------------|------------------|-------------------------|
| not shown | Bonobo        |            | NC001644         |                         |
| not shown | Chimp         |            | NC001643         |                         |
| not shown | Denisovan     |            | FR695060         |                         |
| not shown | Denisovan     |            | FN673705         |                         |
| not shown | Gorilla       |            | NC011120         |                         |
| not shown | Neanderthal   |            | KJ533544         | Vi33.17                 |
| not shown | Neanderthal   |            | KJ533545         | Vi33.19                 |
| not shown | Neanderthal   |            | FM865407         | Feldhofer1              |
| not shown | Neanderthal   |            | FM865408         | Feldhofer2              |
| not shown | Neanderthal   |            | FM865409         | EISidron1253            |
| not shown | Neanderthal   |            | FM865410         | Vindija33.25            |
| not shown | Neanderthal   |            | FM865411         | Mezmaiskaya1            |
| 1         | AU            | S1a        | DQ404440         |                         |
| 2         | AU/Desert     | S1a        | DQ404441         |                         |
| 3         | AU            | N14        | DQ112753         |                         |
| 4         | AU            | S1         | AF346963         |                         |
| 5         | AU            | S          | DQ112751         |                         |
| 6         | AU/Kalumburu  | S5         | EF495220         |                         |
| 7         | AU            | S4         | AY289062         |                         |
| 8         | AU            | S3         | AY289066         |                         |
| 9         | AU            | S3         | AY289067         |                         |
| 10        | AU            | S2         | AF346965         |                         |
| 11        | AU            | S2         | AY289060         |                         |
| 12        | AU            | S2         | AY289051         |                         |
| 13        | AU            | S2         | AY289061         |                         |
| 14        | AU/Kalumburu  | N13        | EF495214         |                         |
| 15        | AU            | O          | AY289059         |                         |
| 16        | AU            | O1         | DQ404447         |                         |
| 17        | AU/Kalgoorlie | O1a        | NA               | Rasmussen et al. (2011) |
| 18        | AU            | O1a        | AY289056         |                         |
| 19        | AU            | O1a        | AY289058         |                         |
| 20        | AU            | R12        | DQ112752         |                         |
| 21        | AU            | P3a        | AY289052         |                         |
| 22        | AU            | P3a        | AY289065         |                         |
| 23        | AU/ArnhemLand | P3b1       | EF061153         |                         |
| 24        | AU            | P5         | AY289063         |                         |
| 25        | AU            | P7         | AY289054         |                         |
| 26        | AU            | P6         | AY289053         |                         |
| 27        | AU            | P6         | AY289055         |                         |
| 28        | AU/Riverine   | P8         | DQ404446         |                         |
| 29        | AU            | P4b        | AY289064         |                         |
| 30        | AU            | P4b1       | AY289057         |                         |
| 31        | AU/Riverine   | P4b1       | DQ404444         |                         |
| 32        | AU            | K1d        | DQ112750         |                         |
| 33        | AU/Kalumburu  | Q2b        | EF495218         |                         |
| 34        | AU/Kalumburu  | M15        | EF495219         |                         |
| 35        | AU/Kalumburu  | M14        | EF495222         |                         |

|    |           |      |          |  |
|----|-----------|------|----------|--|
| 36 | AU        | M42a | DQ404443 |  |
| 37 | AU        | M42a | DQ404445 |  |
| 38 | AU/Desert | M42a | DQ404442 |  |
| 39 | AU        | M42a | DQ112754 |  |
| 40 | AU        | M42a | AF346964 |  |
| 41 | AU        | M42a | DQ112755 |  |

**Table S6B - Details of the sequences shown in Figure S3**

| <b>Modern Aboriginal Australians</b> | <b>Neanderthal</b> | <b>Ancient Australians</b>         |
|--------------------------------------|--------------------|------------------------------------|
| AF039317                             | FM865407           | AF328745 - LM3 Adcock et.al (2001) |
| AF039318                             | FM865408           | AF328746 – LM4 Adcock et.al (2001) |
| AF039319                             |                    |                                    |
| AF039320                             |                    |                                    |
| AF039321                             |                    |                                    |
| AF039322                             |                    |                                    |
| AF039323                             |                    |                                    |
| AF039324                             |                    |                                    |
| AF039325                             |                    |                                    |
| AF039326                             |                    |                                    |
| AF039327                             |                    |                                    |
| AF039328                             |                    |                                    |
| AF039329                             |                    |                                    |
| AF039330                             |                    |                                    |
| AF039331                             |                    |                                    |
| AF039332                             |                    |                                    |
| AF039333                             |                    |                                    |
| AF039334                             |                    |                                    |
| AF039335                             |                    |                                    |
| AF039336                             |                    |                                    |
| AF039337                             |                    |                                    |
| AF039338                             |                    |                                    |
| AF039339                             |                    |                                    |
| AF039340                             |                    |                                    |
| AF039341                             |                    |                                    |
| AF039342                             |                    |                                    |
| AF039343                             |                    |                                    |
| AF039344                             |                    |                                    |
| AF039345                             |                    |                                    |
| AF039346                             |                    |                                    |
| AF039347                             |                    |                                    |
| AF039348                             |                    |                                    |
| AF039349                             |                    |                                    |
| AF039350                             |                    |                                    |
| AF039351                             |                    |                                    |
| AF039352                             |                    |                                    |
| AF039353                             |                    |                                    |
| AF039354                             |                    |                                    |
| AF039355                             |                    |                                    |

|          |  |  |
|----------|--|--|
| AF039356 |  |  |
| AF039357 |  |  |
| AF039358 |  |  |
| AF039359 |  |  |
| AF039360 |  |  |
| AF039361 |  |  |
| AF039362 |  |  |
| AF039363 |  |  |
| AF176126 |  |  |
| AF176128 |  |  |
| AF176129 |  |  |
| AF176131 |  |  |
| AF176132 |  |  |
| AF176133 |  |  |
| AF176134 |  |  |
| AF176135 |  |  |
| AF176136 |  |  |
| AF176137 |  |  |
| AF176138 |  |  |
| AF176139 |  |  |
| AF176140 |  |  |
| AF176141 |  |  |
| AF176142 |  |  |
| AF176143 |  |  |
| AF176144 |  |  |
| AF176156 |  |  |
| AF176157 |  |  |
| AF176158 |  |  |
| AF176159 |  |  |
| AF176160 |  |  |
| AF176164 |  |  |
| AF176165 |  |  |
| AF176166 |  |  |
| AF176168 |  |  |
| AF176169 |  |  |
| AF176170 |  |  |
| AF176171 |  |  |
| AF176172 |  |  |
| AF176173 |  |  |
| AF176175 |  |  |
| AF176176 |  |  |
| AF176177 |  |  |
| AF176181 |  |  |
| AF176183 |  |  |
| AF176185 |  |  |
| AF176186 |  |  |
| AF176187 |  |  |
| AF176188 |  |  |

|          |  |  |
|----------|--|--|
| AF176189 |  |  |
| AF176190 |  |  |
| AF176191 |  |  |
| AF176192 |  |  |
| AF176193 |  |  |
| AF176194 |  |  |
| AF176195 |  |  |
| AF176200 |  |  |
| AF176201 |  |  |
| AF176202 |  |  |
| AF346963 |  |  |
| AF346964 |  |  |
| AY289051 |  |  |
| AY289052 |  |  |
| AY289053 |  |  |
| AY289054 |  |  |
| AY289055 |  |  |
| AY289056 |  |  |
| AY289057 |  |  |
| AY289058 |  |  |
| AY289059 |  |  |
| AY289060 |  |  |
| AY289061 |  |  |
| AY289062 |  |  |
| AY289063 |  |  |
| AY289064 |  |  |
| AY289065 |  |  |
| AY289066 |  |  |
| AY289067 |  |  |
| DQ404440 |  |  |
| DQ404441 |  |  |
| DQ404442 |  |  |
| DQ404443 |  |  |
| DQ404444 |  |  |
| DQ404445 |  |  |
| DQ404446 |  |  |
| DQ404447 |  |  |
| EF495214 |  |  |
| EF495218 |  |  |
| EF495219 |  |  |
| EF495220 |  |  |
| EF495222 |  |  |
| JN226143 |  |  |
| JN226144 |  |  |
| JN226145 |  |  |
| S80333   |  |  |
| U37730   |  |  |
| U37731   |  |  |

|        |  |  |
|--------|--|--|
| U37732 |  |  |
| U37733 |  |  |

**Table S6C - Details of the sequences shown in Figure S5A**

| Number | Origin     | Haplogroup | Accession number | Note |
|--------|------------|------------|------------------|------|
| 1      | Korean     | B4a1b1a    | AF346993         |      |
| 2      | Samoan     | B4a1a1o    | AF347007         |      |
| 3      | Piman      | B2a5       | AF347001         |      |
| 4      | Uzbek      | B4c2a      | AF347011         |      |
| 5      | Italian    | U5b3a1a    | AF346988         |      |
| 6      | Tatar      | H5         | AF346974         |      |
| 7      | Dutch      | H5a1a      | AF346975         |      |
| 8      | French     | H1r        | AF346981         |      |
| 9      | Saami      | V7a1       | AF347006         |      |
| 10     | English    | HV0        | AF346978         |      |
| 11     | Georgian   | T2e        | AF346982         |      |
| 12     | German     | J1c4       | AF346983         |      |
| 13     | China      | F4a1b      | AF346973         |      |
| 14     | PNG        | P1d1       | AF347005         |      |
| 15     | PNG        | P1         | AF347002         |      |
| 16     | PNG        | P1         | AF347004         |      |
| 17     | Australian | S2         | AF346965         |      |
| 18     | Australian | S1         | AF346963         |      |
| 19     | Chukchi    | A2b1       | AF346971         |      |
| 20     | Buriat     | C4b3       | AF346970         |      |
| 21     | Khirgiz    | C4b1       | AF346991         |      |
| 22     | Evenki     | C4a2       | AF346979         |      |
| 23     | Warao      | C1d1       | AF347012         |      |
| 24     | Warao      | C1d1       | AF347013         |      |
| 25     | Australian | M42a       | AF346964         |      |
| 26     | PNG        | Q1b        | AF347003         |      |
| 27     | Inuit      | D2a1b      | AF347010         |      |
| 28     | Japanese   | D4b2b1     | AF346989         |      |
| 29     | Japanese   | D4a1       | AF346990         |      |
| 30     | Guarani    | D1a2       | AF346984         |      |
| 31     | China      | M9a1a1a    | AF346972         |      |
| 32     | Indian     | G3b1       | AF346966         |      |
| 33     | Yoruba     | L3e2b1a1   | AF347015         |      |
| 34     | Lisongo    | L3e2b7     | AF346994         |      |
| 35     | Bamileke   | L3e3b2     | AF346967         |      |
| 36     | Ewondo     | L3e1e1     | AF346980         |      |
| 37     | Yoruba     | L3d1a1a    | AF347014         |      |
| 38     | Mkamba     | L3h1a2a1   | AF347000         |      |
| 39     | Effik      | L2a1a2     | AF346977         |      |
| 40     | Effik      | L2a1i1     | AF346976         |      |
| 41     | Mandenka   | L2c3a      | AF346995         |      |
| 42     | Mbenzele   | L1c1a1a1a  | AF346997         |      |



|    |             |           |          |              |
|----|-------------|-----------|----------|--------------|
| 43 | Biaka       | L1c1a1a1a | AF346968 |              |
| 44 | Biaka       | L1c1a2b   | AF346969 |              |
| 45 | Mbenzele    | L1c1a2b   | AF346996 |              |
| 46 | Ibo         | L1c1d1    | AF346987 |              |
| 47 | Kikuyu      | L1c2a1a   | AF346992 |              |
| 48 | Ibo         | L1b1a3    | AF346986 |              |
| 49 | Mbuti       | L0a2b     | AF346999 |              |
| 50 | Mbuti       | L0a2b     | AF346998 |              |
| 51 | Hausa       | L0a1a2    | AF346985 |              |
| 52 | San         | L0k1a1c   | AF347009 |              |
| 53 | San         | L0k1a1a   | AF347008 |              |
| 54 | Neanderthal |           | FM865410 | Vindija33.25 |
| 55 | Neanderthal |           | FM865407 | Feldhofer1   |
| 56 | Neanderthal |           | KJ533544 | Vi33.17      |
| 57 | Neanderthal |           | KJ533545 | Vi33.19      |
| 58 | Neanderthal |           | FM865409 | EISidron1253 |
| 59 | Neanderthal |           | FM865408 | Feldhofer2   |
| 60 | Neanderthal |           | FM865411 | Mezmaiskaya1 |
| 61 | Denisovan   |           | FN673705 |              |
| 62 | Denisovan   |           | FR695060 |              |
| 63 | Bonobo      |           | NC001644 |              |
| 64 | Chimp       |           | NC001643 |              |
| 65 | Gorilla     |           | NC011120 |              |

**Table S6D – Details of the sequences shown in Figure S5B**

| Number | Origin      | Haplogroup | Accession number | Note         |
|--------|-------------|------------|------------------|--------------|
| 60     | Neanderthal |            | FM865411         | Mezmaiskaya1 |
| 59     | Neanderthal |            | FM865408         | Feldhofer2   |
| 56     | Neanderthal |            | KJ533544         | Vi33.17      |
| 57     | Neanderthal |            | KJ533545         | Vi33.19      |
| 55     | Neanderthal |            | FM865407         | Feldhofer1   |
| 54     | Neanderthal |            | FM865410         | Vindija33.25 |
| 58     | Neanderthal |            | FM865409         | EISidron1253 |
| 64     | Chimp       |            | NC001643         |              |
| 63     | Bonobo      |            | NC001644         |              |
| 50     | Mbuti       | L0a2b      | AF346998         |              |
| 49     | Mbuti       | L0a2b      | AF346999         |              |
| 51     | Hausa       | L0a1a2     | AF346985         |              |
| 53     | San         | L0k1a1a    | AF347008         |              |
| 52     | San         | L0k1a1c    | AF347009         |              |
| 62     | Denisovan   |            | FR695060         |              |
| 61     | Denisovan   |            | FN673705         |              |
| 42     | Mbenzele    | L1c1a1a1a  | AF346997         |              |
| 43     | Biaka       | L1c1a1a1a  | AF346968         |              |
| 45     | Mbenzele    | L1c1a2b    | AF346996         |              |
| 44     | Biaka       | L1c1a2b    | AF346969         |              |
| 46     | Ibo         | L1c1d1     | AF346987         |              |

|    |            |          |          |  |
|----|------------|----------|----------|--|
| 47 | Kikuyu     | L1c2a1a  | AF346992 |  |
| 48 | Ibo        | L1b1a3   | AF346986 |  |
| 38 | Mkamba     | L3h1a2a1 | AF347000 |  |
| 25 | Australian | M42a     | AF346964 |  |
| 17 | Australian | S2       | AF346965 |  |
| 7  | Dutch      | H5a1a    | AF346975 |  |
| 27 | Inuit      | D2a1b    | AF347010 |  |
| 19 | Chukchi    | A2b1     | AF346971 |  |
| 28 | Japanese   | D4b2b1   | AF346989 |  |
| 30 | Guarani    | D1a2     | AF346984 |  |
| 32 | Indian     | G3b1     | AF346966 |  |
| 29 | Japanese   | D4a1     | AF346990 |  |
| 31 | China      | M9a1a1a  | AF346972 |  |
| 40 | Effik      | L2a1i1   | AF346976 |  |
| 39 | Effik      | L2a1a2   | AF346977 |  |
| 41 | Mandenka   | L2c3a    | AF346995 |  |
| 1  | Korean     | B4a1b1a  | AF346993 |  |
| 2  | Samoa      | B4a1a1o  | AF347007 |  |
| 3  | Piman      | B2a5     | AF347001 |  |
| 4  | Uzbek      | B4c2a    | AF347011 |  |
| 33 | Yoruba     | L3e2b1a1 | AF347015 |  |
| 34 | Lisongo    | L3e2b7   | AF346994 |  |
| 9  | Saami      | V7a1     | AF347006 |  |
| 10 | English    | HV0      | AF346978 |  |
| 13 | China      | F4a1b    | AF346973 |  |
| 12 | German     | J1c4     | AF346983 |  |
| 11 | Georgian   | T2e      | AF346982 |  |
| 6  | Tatar      | H5       | AF346974 |  |
| 8  | French     | H1r      | AF346981 |  |
| 15 | PNG        | P1       | AF347002 |  |
| 14 | PNG        | P1d1     | AF347005 |  |
| 16 | PNG        | P1       | AF347004 |  |
| 5  | Italian    | U5b3a1a  | AF346988 |  |
| 18 | Australian | S1       | AF346963 |  |
| 37 | Yoruba     | L3d1a1a  | AF347014 |  |
| 26 | PNG        | Q1b      | AF347003 |  |
| 35 | Bamileke   | L3e3b2   | AF346967 |  |
| 36 | Ewondo     | L3e1e1   | AF346980 |  |
| 24 | Warao      | C1d1     | AF347013 |  |
| 23 | Warao      | C1d1     | AF347012 |  |
| 22 | Evenki     | C4a2     | AF346979 |  |
| 21 | Khirgiz    | C4b1     | AF346991 |  |
| 20 | Buriat     | C4b3     | AF346970 |  |
| 65 | Gorilla    |          | NC011120 |  |



|                      |   |   |   |   |   |   |   |   |   |   |   |   |   |   |   |   |   |   |   |   |   |   |   |
|----------------------|---|---|---|---|---|---|---|---|---|---|---|---|---|---|---|---|---|---|---|---|---|---|---|
| LM4 <sup>1</sup>     | . | . | . | . | T | . | . | . | . | G | . | . | . | . | . | . | . | . | C | . | . | . | . |
| WLH4(S2)             | . | . | . | . | . | . | . | . | . | . | . | . | . | . | . | . | . | . | . | . | . | . | . |
| ) HISEQ <sup>3</sup> | . | . | . | . | T | T | . | . | . | . | . | . | . | . | . | . | . | . | . | . | . | . | . |
| WLH4(V3)             | . | . | . | . | . | . | . | . | . | . | . | . | . | . | . | . | . | . | . | . | . | . | . |
| c)                   | . | . | . | . | . | . | . | . | . | . | . | . | . | . | . | . | . | . | . | . | . | . | . |
| HISEQ <sup>3</sup>   | . | . | . | . | . | G | . | . | . | . | . | . | . | . | . | . | . | . | C | . | . | . | . |

Nucleotide positions on the revised Cambridge reference mitochondrial genome are given above each column. <sup>1</sup> indicates the sequence was observed by Adcock et al. 2001, <sup>2</sup> by the laboratory in Oxford, UK and <sup>3</sup> by the laboratory in Brisbane, Australia. AT and GJA are the sequences of Alan Thorne and Gregory Adcock themselves, the contaminant represents a sequence regularly observed and reported by Adock et al 2001. A "." indicates the sequence its nucleotide matches that of the reference sequence, absence of a character indicates the essay did not recover or target the nucleotide. The bold "Y" indicates a base difference (cytosine or thymine) for GJA's Genbank and Table 1 sequences. Polymorphisms that occurred only once in the PCR and SPEX clones have been disregarded for this table.

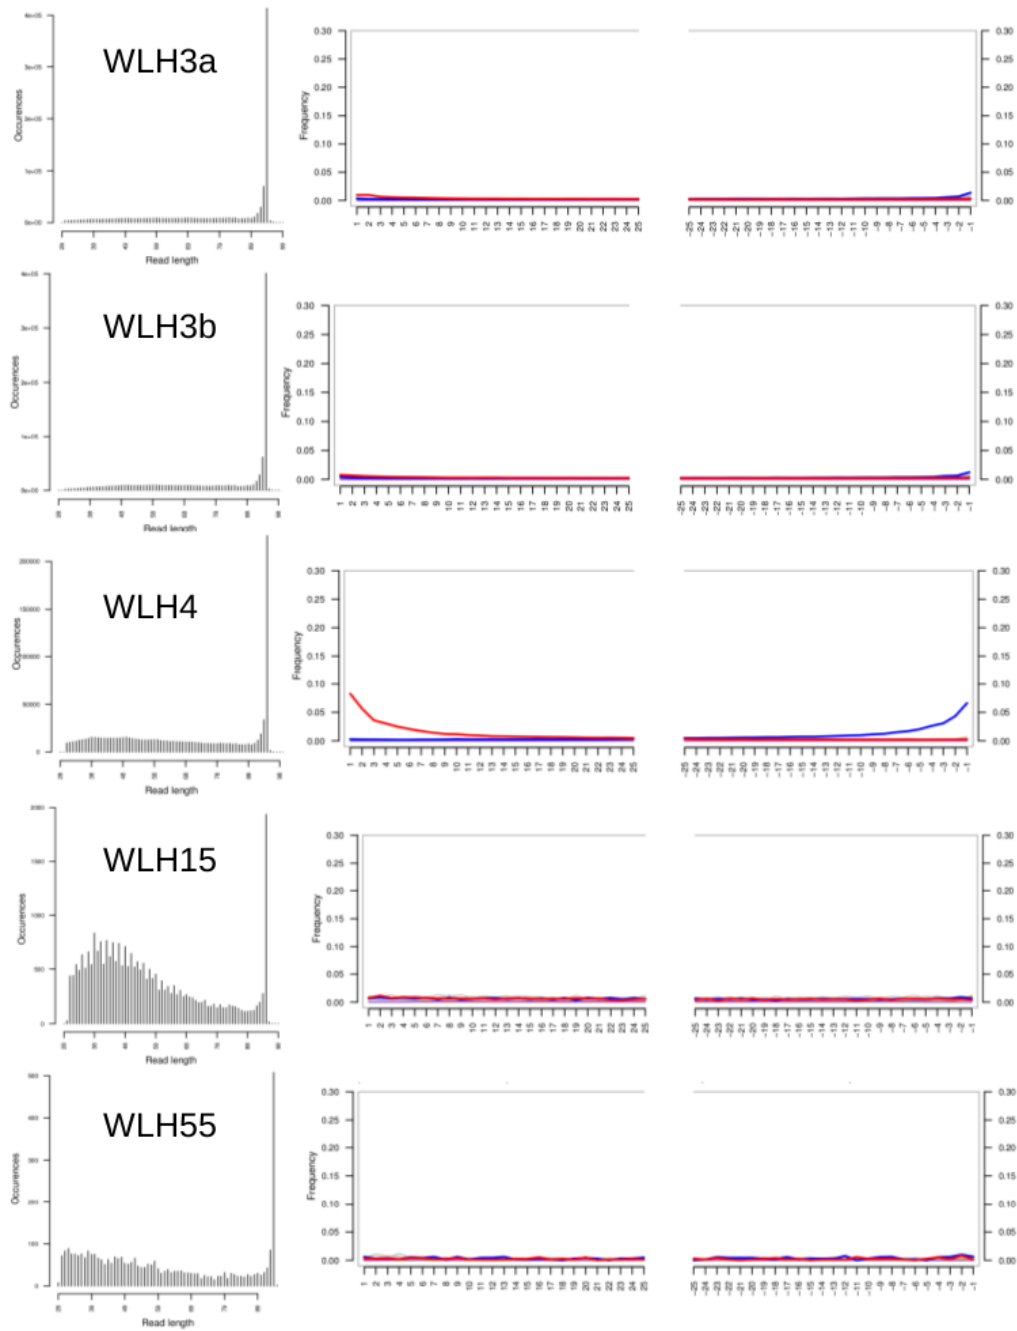

**Figure S1. Read length (A) and damage distributions (B) for genomic data.**

Molecular damage as represented by 3' guanine to adenine substitutions (red) and 5' cytosine to thymine substitutions (blue) in recovered DNA sequences for Willandra Lakes samples WLH3 (samples a and b), WLH4, WLH15 and WLH55.

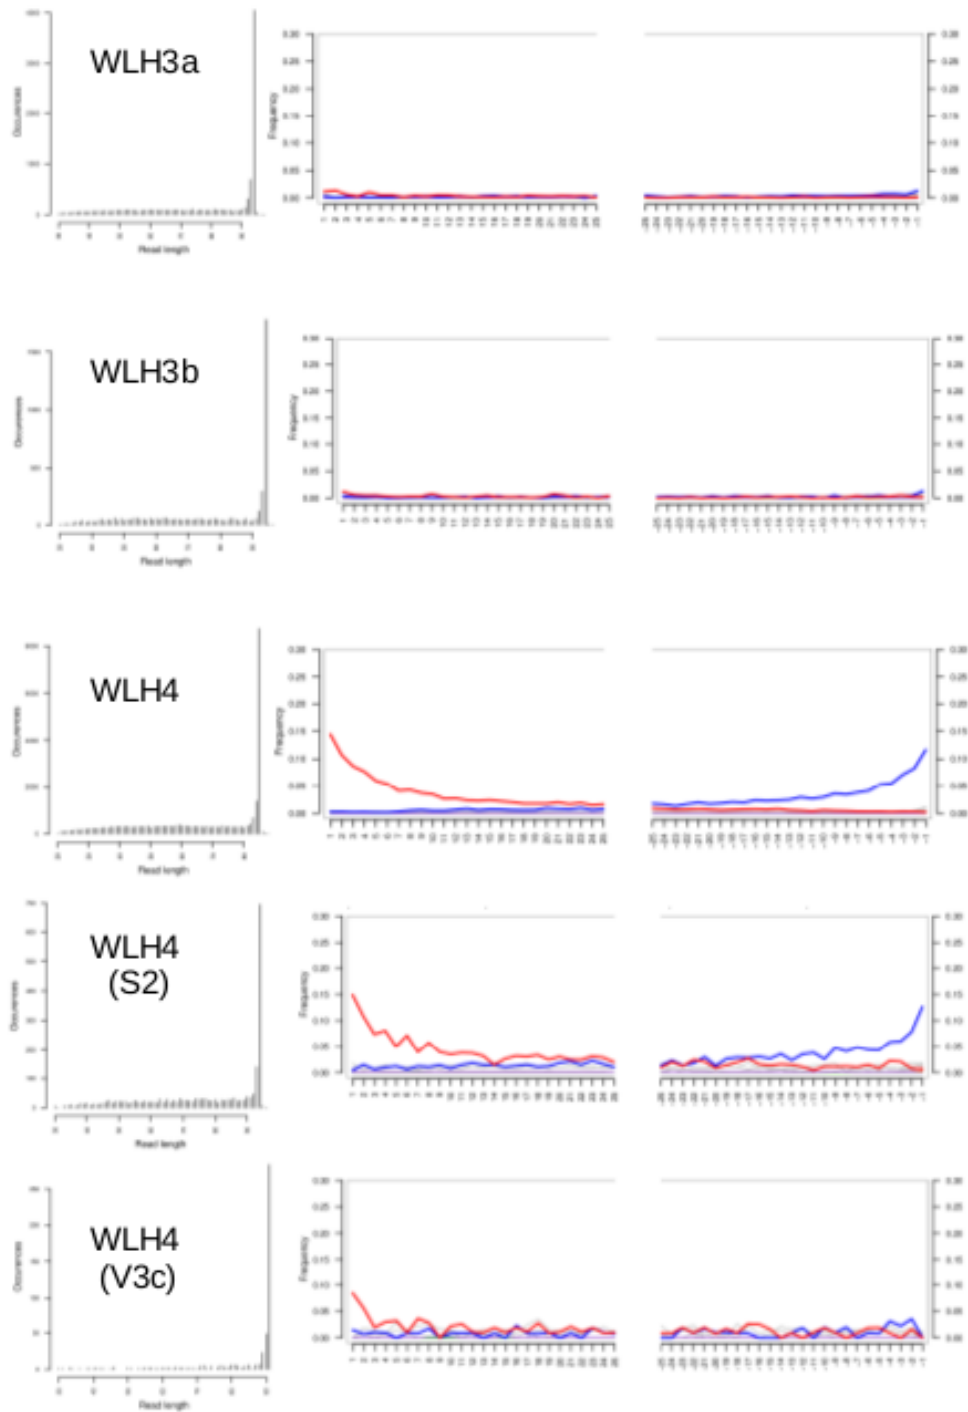

**Figure S2 Read length and damage distributions for mitochondrial data.** Damage is represented by observed 3' guanine to adenine substitutions (blue) and 5' cytosine to thymine substitutions (red).

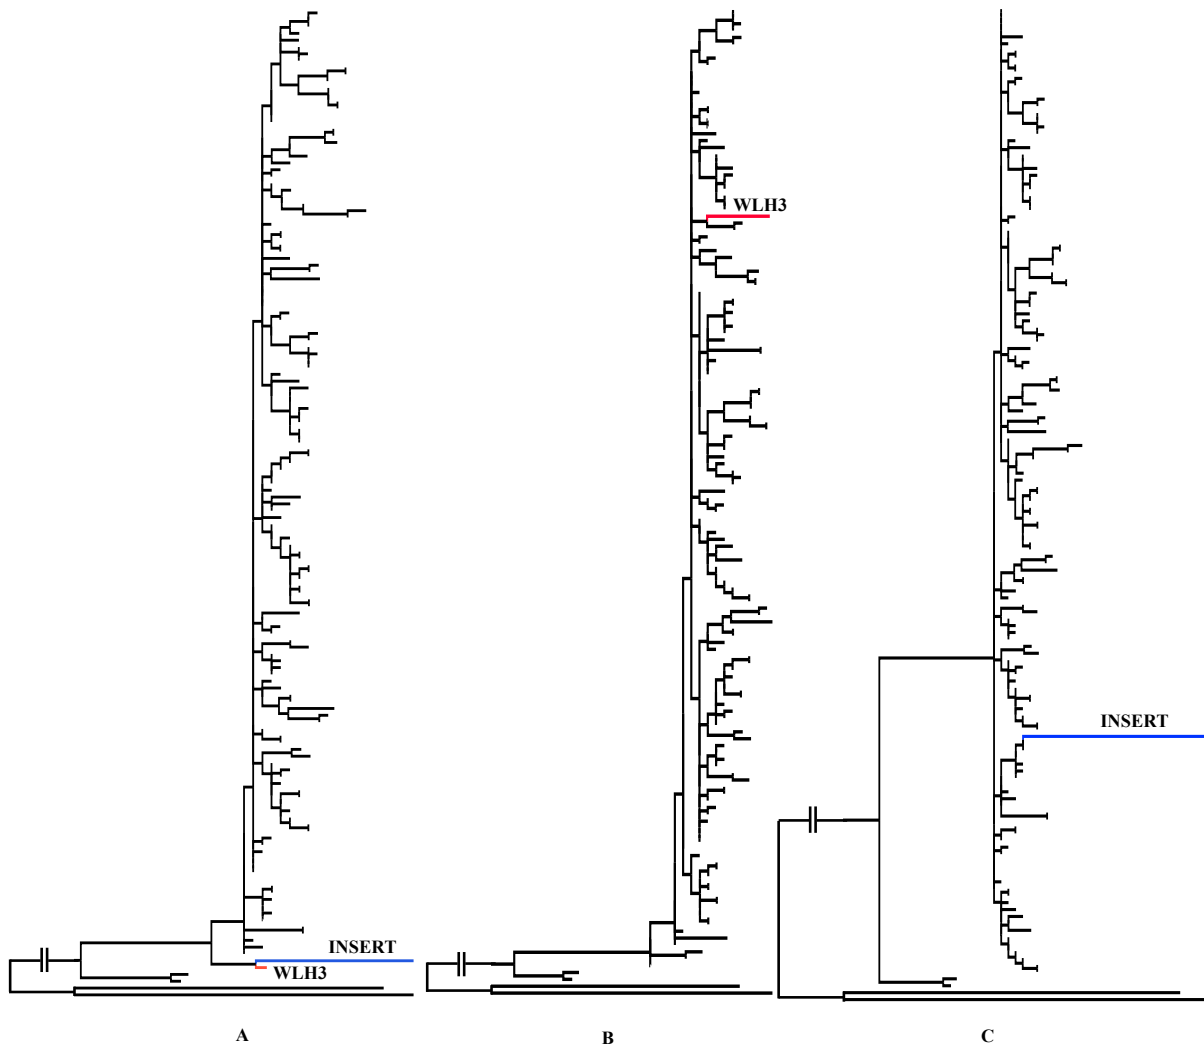

**Figure S3.** Maximum likelihood trees of Aboriginal Australian based on mitochondrial HVR1 sequences. The trees were constructed using ancient and 137 modern HVR1 sequences along with a nuclear insert of HVR1, Chimpanzee, Bonobo and Neanderthal sequences. (A) Includes both WLH3 (LM3) and the nuclear insert sequences (B) Only WLH3 and (C) Only the insert sequence. This figure shows that WLH3 falls outside the rest of the Australian Aboriginal HVR sequences only when WLH3 and the nuclear insert sequence is included. Note that the tree is rooted using Chimpanzee and Bonobo sequences, which are not shown in the figure.

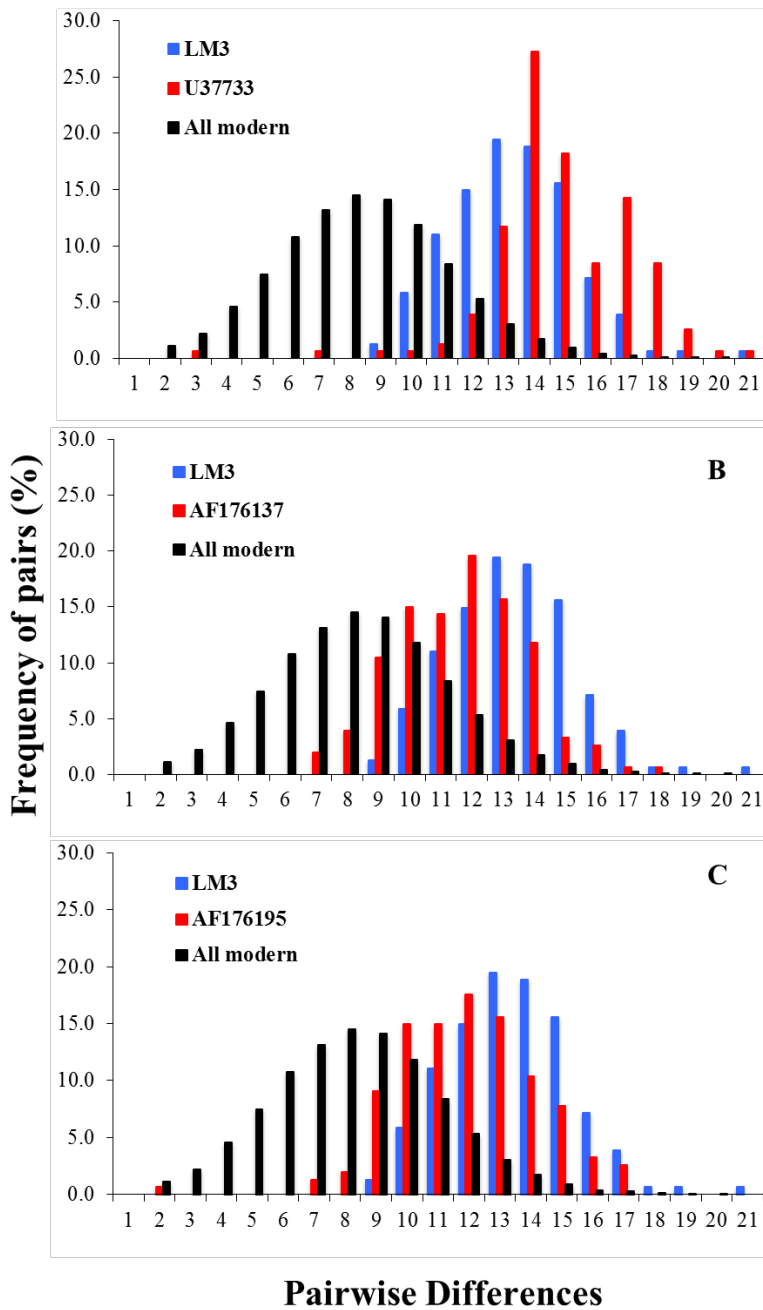

**Figure S4. Pairwise distances for Australian Aborigines**

Pairwise distances estimated within contemporary Australian Aborigines (Black), between LM3 (WLH3) and modern Australians (Blue) and between fast evolving and other remaining modern Australians (Red).



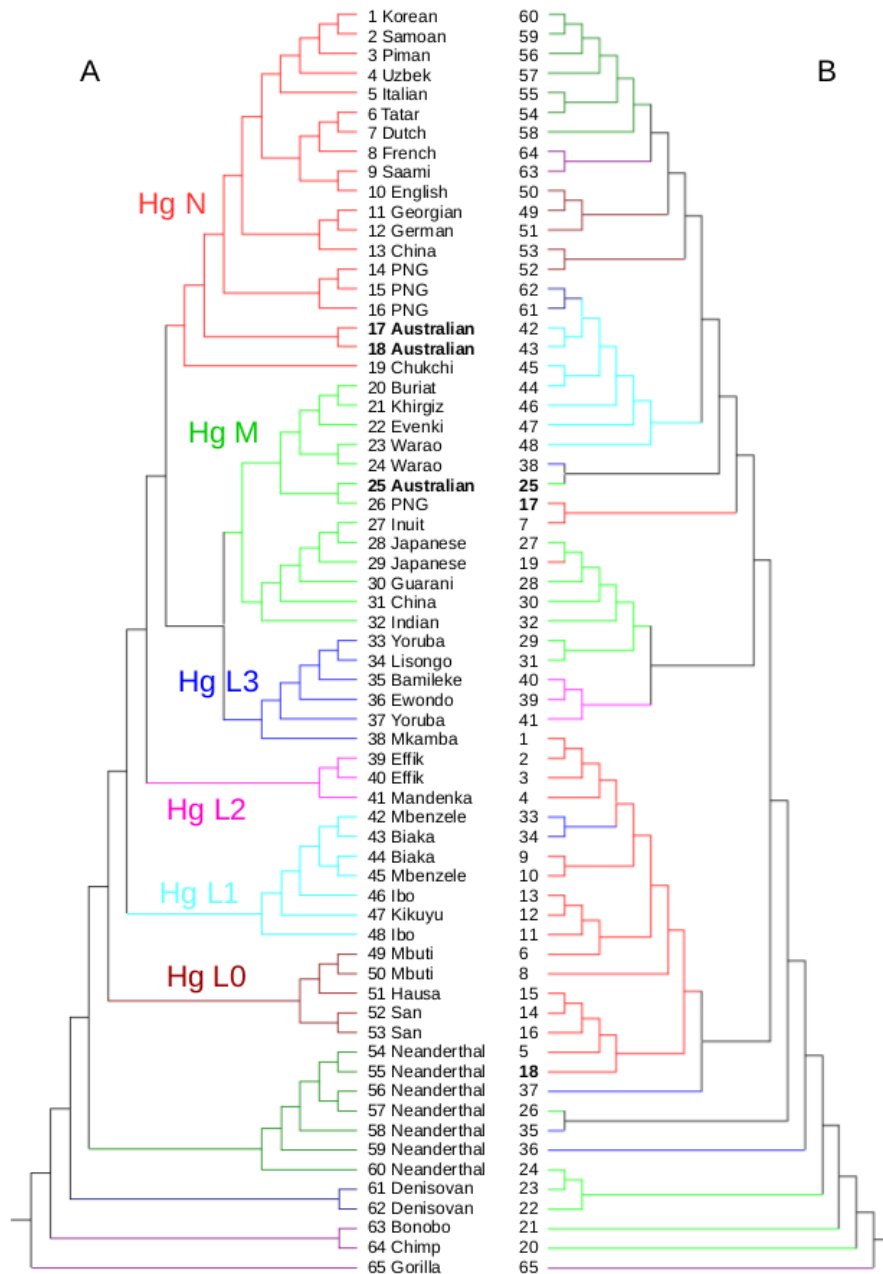

**Figure S5. Comparison of Maximum Likelihood trees.**

Only the topology is shown for clarity. The data in Figure S5A are complete mitochondrial genomes. Figure S5B shows relationships among sequences for the same dataset but trimmed to the amplicon reported by Adcock et al. (2001). The branches are colour coded as follows: Apes (purple), Denisovans (dark blue), Neanderthals (dark green), major human haplogroups: L0 (dark red), L1 (turquoise), L2 (pink), L3 (blue), M\* (green), N\* (red). Gorilla was forced as the outgroup. Details of the sequences can be found in Table S6.

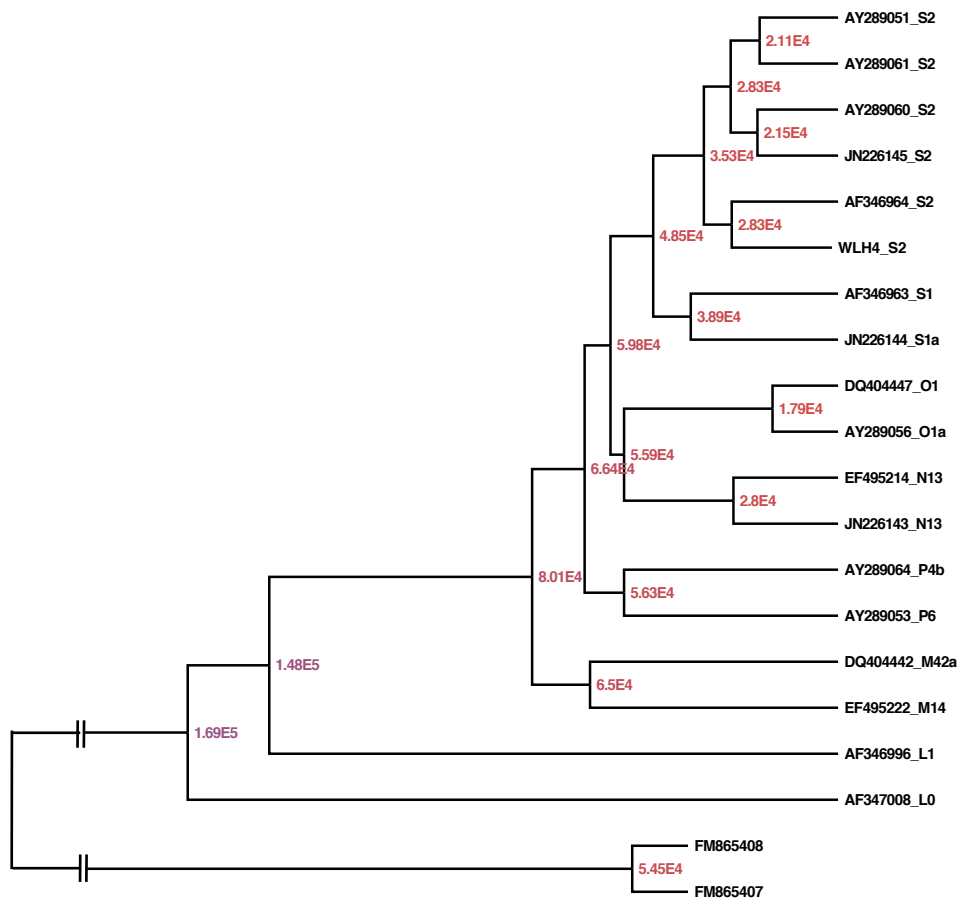

**Figure S6. Bayesian time tree of Australian haplogroups**

The time tree of Australian S2 haplogroup along with other Australian haplogroups, African and Neanderthal outgroups. The complete mitochondrial genomes were used to construct a Bayesian tree, using BEAST. The tree was calibrated using the tip dates of Neanderthal (39,000 years) and WLH4 (1,600 years) and the age of human-Neanderthal split (320,000 – 620,000 years) was also used to calibrate the root of the tree (see methods).

## References

1. Lindgreen S (2012) AdapterRemoval: easy cleaning of next-generation sequencing reads. *BMC Research Notes* 5(1):337.
2. Li H, Durbin R (2010) Fast and accurate long-read alignment with Burrows–Wheeler transform. *Bioinformatics* 26(5):589-595.
3. Schubert M, et al. (2012) Improving ancient DNA read mapping against modern reference genomes. *BMC genomics* 13(1):178.
4. McKenna A, et al. (2010) The Genome Analysis Toolkit: a MapReduce framework for analyzing next-generation DNA sequencing data. *Genome research* 20(9):1297-1303.
5. Jónsson H, Ginolhac A, Schubert M, Johnson PL, Orlando L (2013) mapDamage2.0: fast approximate Bayesian estimates of ancient DNA damage parameters. *Bioinformatics* btt193.
6. Andrews RM, et al. (1999) Reanalysis and revision of the Cambridge reference sequence for human mitochondrial DNA. *Nature genetics* 23(2):147-147.
7. Van Oven M, Kayser M (2009) Updated comprehensive phylogenetic tree of global human mitochondrial DNA variation. *Human mutation* 30(2):E386-E394.
8. Katoh K, Standley DM (2013) MAFFT multiple sequence alignment software version 7: improvements in performance and usability. *Molecular biology and evolution* 30(4):772-780.

9. Tamura K, et al. (2011) MEGA5: molecular evolutionary genetics analysis using maximum likelihood, evolutionary distance, and maximum parsimony methods. *Molecular biology and evolution* 28(10):2731-2739.
10. Rasmussen M, et al. (2011) An Aboriginal Australian genome reveals separate human dispersals into Asia. *Science* 334(6052):94-98.
11. Vianello D, et al. (2013) HAPLOFIND: A New Method for High-Throughput mtDNA Haplogroup Assignment. *Human mutation* 34(9):1189-1194.
12. Adcock GJ, et al. (2001) Mitochondrial DNA sequences in ancient Australians: implications for modern human origins. *Proc Natl Acad Sci USA* 98(2):537-542.
13. Drummond AJ, Suchard MA, Xie D & Rambaut A (2012) Bayesian phylogenetics with BEAUti and the BEAST 1.7 *Molecular Biology And Evolution* 29: 1969-1973.
14. Briggs, AW et.al (2009) Targeted Retrieval and Analysis of Five Neandertal mtDNA Genomes. *Science* 325, 318-321.
15. Brotherton P, et al. (2013) Neolithic mitochondrial H genomes and the genetic origins of Europeans. *Nature Communications* 4:1764.
16. Brotherton P, Sanchez JJ, Cooper A, Endicott P (2009) Preferential access to genetic information from endogenous hominin ancient DNA and accurate quantitative SNP-typing via SPEX. *Nucleic Acids Research* 38(2):e7.
17. Edgar RC (2004) MUSCLE: multiple sequence alignment with high accuracy and high throughput. *Nucleic acids research* 32(5):1792-1797.
18. Ingman M, Kaessmann H, Pääbo S, Gyllensten U (2000) Mitochondrial genome variation

and the origin of modern humans. *Nature* 408(6813):708-713.

19. Stamatakis A (2006) RAxML-VI-HPC: maximum likelihood-based phylogenetic analyses with thousands of taxa and mixed models. *Bioinformatics* 22(21):2688-2690.
